# Supplementary material for: Detrital Zircon Geochronology of the Volyn-Orsha Sedimentary Basin in Western Ukraine: Implications for the Meso-Neoproterozoic History of Baltica and Possible Link to Amazonia and the Grenvillian – Sveconorwegian – Sunsas Orogenic Belt
Source: Preprints.org preprint supplement (doi:10.20944/preprints202303.0518.v1), 2023-03-30
Supplement: Supplementary file 1 [file supplementary]

## Sheet: Data
Spot number	U ppm	Th ppm	207Pb/235U	2s	206Pb/238U	2s	rho	238U/206Pb	2s	207Pb/206Pb	2s	rho		Age207Pb/235U	2s	Age206Pb/238U	2s	Age207Pb/206Pb	2s		206Pb/204Pb
70-106.5-1	95.2	47.25	3.519	0.126308	0.2667	0.00950647	0.87532	3.74953	0.133651	0.09545	0.00195466	0.509783		1531.4	6.3	1523.9	9	1536.1	8.3		17275.6
70-106.5-4	128.7	99.9	3.414	0.127683	0.2626	0.00969972	0.96156	3.80807	0.14066	0.09466	0.00192902	0.51117		1507	10	1503	16	1520.4	7.4		9344.32
70-106.5-5	150.5	66.1	3.709	0.133701	0.2656	0.0095763	0.9494	3.76506	0.135751	0.10173	0.00204088	0.382446		1573.2	6.8	1519	12	1655	2.9		7661.54
70-106.5-7	85.2	48.13	2.54	0.0920826	0.2241	0.00800503	0.71809	4.46229	0.159397	0.08266	0.00174229	0.281037		1283.3	6.9	1303.3	8.6	1260	13		9092.89
70-106.5-8	86	53.48	2.418	0.0869611	0.2179	0.00793747	0.75583	4.58926	0.167174	0.08136	0.00172087	0.521893		1248	6	1271	12	1229	14		31081
70-106.5-11	142.7	55.8	2.08	0.0749923	0.1956	0.00707868	0.76837	5.11247	0.185018	0.07776	0.00163057	0.497355		1142.1	5.9	1151.8	9.5	1140	12		6405.79
70-106.5-13	331.9	184.6	2.423	0.0878686	0.2132	0.00780842	0.88892	4.69043	0.171786	0.08298	0.00171192	0.307341		1251.3	7.4	1246	12	1267.7	9.8		55702
70-106.5-14	226.8	86.8	2.505	0.0972158	0.2196	0.00836448	0.94024	4.55373	0.17345	0.08317	0.00173127	0.30459		1273	12	1280	18	1272	11		17033.1
70-106.5-15	63.14	19.53	2.139	0.0806521	0.2006	0.00763508	0.84987	4.98505	0.189737	0.07774	0.00165599	0.38578		1161.2	9.7	1179	16	1139	15		6676.66
70-106.5-16	120.8	61.7	4.884	0.187482	0.3167	0.0120398	0.9476	3.15756	0.120039	0.11162	0.00227344	0.468578		1799	13	1773	23	1825.1	7		5393.68
70-106.5-17	160.3	45.58	2.372	0.0845477	0.2077	0.00740308	0.90081	4.81464	0.171609	0.0828	0.00168295	0.454029		1234	4.8	1216.3	7.5	1263.5	7.1		9957.19
70-106.5-19	169.5	59.3	2.831	0.107619	0.2353	0.00887206	0.93662	4.24989	0.160244	0.08704	0.00178616	0.411276		1363	11	1362	17	1360.4	8.8		18732.4
70-106.5-20	109.8	41.52	4.163	0.15574	0.2987	0.0109935	0.93423	3.34784	0.123215	0.10037	0.00205087	0.381211		1667	11	1685	17	1630.1	7.8		4368.51
70-106.5-22	177.1	91.8	3.899	0.144009	0.2801	0.0103763	0.94702	3.57015	0.132257	0.10039	0.00205333	0.532087		1613.3	9.5	1592	17	1630.3	8.1		10591.5
70-106.5-23	75.1	28.01	24.39	0.884092	0.6696	0.024268	0.96164	1.49343	0.0541257	0.26238	0.00529541	0.472739		3283.7	9.1	3304	24	3260.3	4.3		22102.9
70-106.5-24	76.9	40.26	5.991	0.216527	0.3517	0.0124263	0.94554	2.84333	0.100461	0.12299	0.0024971	0.412504		1974.4	7.8	1942.5	8.1	1999.2	6.2		10158.3
70-106.5-26	59.5	23.46	3.507	0.1282	0.2717	0.00991315	0.85689	3.68053	0.134287	0.09283	0.00192805	0.432908		1528.7	8.2	1549	14	1483	11		4187.51
70-106.5-28	63.5	29.4	2.461	0.0905717	0.2144	0.00765245	0.75801	4.66418	0.166476	0.08259	0.00176786	0.463425		1260.4	8.1	1252.3	7.9	1258	15		6885.65
70-106.5-29	219.5	89.3	3.916	0.148059	0.2856	0.0106588	0.97847	3.5014	0.130675	0.09855	0.00198556	0.541148		1617	11	1619	19	1596	4.5		12919.1
70-106.5-30	202	94	2.153	0.0772488	0.1965	0.00713512	0.91373	5.08906	0.184789	0.07923	0.0016186	0.431649		1167.6	4.7	1156	10	1176.9	8.2		15067.2
70-106.5-32	376.6	92.2	1.948	0.0696025	0.1832	0.00656306	0.95034	5.45852	0.195549	0.07682	0.00155503	0.411719		1097.6	4.7	1084.7	7.8	1115.6	6.3		72732.2
70-106.5-33	130.4	42.1	2.095	0.0760037	0.1932	0.00694872	0.9036	5.17598	0.186162	0.07826	0.00159369	0.567298		1147.1	6.4	1138.5	8.5	1152.6	7.5		8788.21
70-106.5-34	174.1	131.1	13.49	0.482624	0.5181	0.0185071	0.8689	1.93013	0.0689464	0.18831	0.00381528	0.391049		2714.1	7	2691	16	2726.6	5.4		37568.2
70-106.5-35	233.4	118	13	0.545	0.5075	0.0197349	0.97194	1.97044	0.0766236	0.1847	0.00402562	0.453373		2678	22	2646	37	2694	15		15836
70-106.5-36	84.1	18.58	2.413	0.0865659	0.2141	0.00762316	0.65057	4.67072	0.166304	0.08145	0.00173598	0.428728		1246.5	5.5	1250.6	7.5	1231	14		12208.4
70-106.5-37	323.7	99.5	2.656	0.095763	0.2301	0.008192	0.93688	4.34594	0.154724	0.08375	0.00170165	0.416212		1316.3	6.5	1334.9	7.7	1285.7	6.9		66693.5
70-106.5-38	50.1	21.42	1.804	0.0682837	0.1774	0.00669341	0.84515	5.63698	0.212687	0.07413	0.00159941	0.499694		1049	10	1053	14	1044	16		4723.01
70-106.5-39	122.5	40.04	3.037	0.112226	0.2449	0.008825	0.91855	4.0833	0.147142	0.08976	0.00182711	0.424366		1416.8	9.1	1412	11	1419.6	7.3		12124.5
70-106.5-41	131.1	23.73	2.36	0.0847571	0.2107	0.00754608	0.92942	4.74608	0.169978	0.08121	0.00164488	0.516847		1230.6	5.7	1232.7	8.3	1225.5	6.4		527454
70-106.5-42	30.84	7.12	2.368	0.0878071	0.211	0.00776519	0.014486	4.73934	0.174416	0.0817	0.00196976	0.298004		1232.9	8.6	1234	13	1237	27		892.273
70-106.5-44	164.8	47.58	2.459	0.0899065	0.2212	0.00807642	0.9503	4.5208	0.165063	0.08119	0.00166323	0.449766		1262	8.4	1288	12	1224.9	8.6		13691.3
70-106.5-45	179.6	112.5	14.2	0.513721	0.5415	0.0193909	0.5452	1.84672	0.0661304	0.1908	0.00410023	0.248182		2762.7	8.4	2790	17	2748	13		63292.4
70-106.5-46	78.3	52.74	3.327	0.128781	0.2709	0.01033	0.94845	3.6914	0.140761	0.08915	0.00185728	0.488217		1487	13	1545	21	1406	11		3724.8
70-106.5-47	57.89	65.31	3.407	0.127104	0.2664	0.0101458	0.89739	3.75375	0.142961	0.09276	0.00193788	0.557235		1506	10	1522	20	1482	11		29692.9
70-106.5-48	274.7	135.6	3.881	0.14731	0.2807	0.0105338	0.97485	3.56252	0.13369	0.10042	0.0020422	0.437928		1609	12	1595	19	1631	6.9		12334.8
70-106.5-49	10.23	2.5	2.432	0.11478	0.2152	0.00920983	0.85476	4.64684	0.198869	0.0824	0.0020386	0.280591		1251	22	1256	28	1252	28		1202.67
70-106.5-50	122.8	47.63	2.374	0.0913671	0.2167	0.00827131	0.91341	4.61468	0.176139	0.07993	0.00169057	0.384999		1234	11	1264	17	1194	14		57873.5
70-106.5-51	23.97	26.51	3.423	0.126954	0.2667	0.0096381	0.66358	3.74953	0.135502	0.09367	0.00206979	0.241793		1509.6	9.6	1524	12	1500	18		1777.19
70-106.5-52	159.3	70.5	2.372	0.088619	0.2158	0.00789543	0.93395	4.63392	0.16954	0.07989	0.00164237	0.504571		1234	9.4	1260	12	1193.2	9.4		15726.6
70-106.5-53	216.4	74	2.21	0.0806971	0.2037	0.00746122	0.88063	4.90918	0.179816	0.07875	0.00163004	0.501477		1184	7.4	1195	12	1165	10		32485.7
70-106.5-55	147	61	2.754	0.108587	0.2325	0.00911202	0.94575	4.30107	0.168566	0.08581	0.00177171	0.531054		1343	13	1347	22	1332.8	9.9		18474.7
70-106.5-56	142.4	49.18	1.805	0.0662652	0.1724	0.0062689	0.80471	5.80046	0.21092	0.07566	0.00160333	0.464593		1047.1	7.3	1025.1	9.5	1085	14		3853.21
70-106.5-57	223	78.8	2.033	0.0924339	0.1755	0.00872756	0.98492	5.69801	0.28336	0.08388	0.00179912	0.15313		1126	20	1042	34	1289	15		3688.61
70-106.5-58	351.7	152.3	2.236	0.0790293	0.1928	0.00695884	0.79714	5.18672	0.187207	0.0837	0.00171227	0.451257		1192.2	3.6	1136.6	9.1	1284.5	8.4		8464.86
70-106.5-59	195.2	39.2	3.186	0.114501	0.2576	0.00912405	0.82836	3.88199	0.137498	0.08972	0.0018429	0.414305		1453.7	6.3	1477.5	7.2	1418.7	9		24698.6
70-106.5-60	56.4	21.47	2.35	0.162373	0.2024	0.00744802	0.42101	4.94071	0.181811	0.0839	0.0048965	0.217081		1223	38	1188	12	1277	95		2429.09
70-106.5-61	172.4	65.5	2.749	0.102729	0.2275	0.00844046	0.64963	4.3956	0.163081	0.0877	0.00179469	0.424202		1341.7	9.8	1321	15	1374.9	8.3		8672.08
70-106.5-62	185.2	66.9	3.451	0.125212	0.2631	0.00938278	0.78035	3.80084	0.135547	0.09534	0.00196629	0.418892		1515.9	7.5	1505.8	9.4	1533.9	9.4		23429.1
70-106.5-63	70.8	29.52	6.045	0.219119	0.3549	0.0127116	0.94094	2.8177	0.100922	0.12336	0.00253676	0.480431		1982.2	8.3	1958	13	2004.4	8.6		12006.2
70-106.5-64	210.2	77	2.379	0.0878468	0.2114	0.00757002	0.90063	4.73037	0.16939	0.08177	0.00167897	0.508963		1236.2	8.5	1236.4	8.6	1239	9.2		55293.9
70-106.5-67	290.4	101.8	5.151	0.190007	0.3258	0.0120195	0.96489	3.06937	0.113236	0.1144	0.00231462	0.437538		1844	10	1818	19	1869.7	5.5		14996.3
70-106.5-68	178.5	30.26	2.469	0.0925016	0.2128	0.00771185	0.95156	4.69925	0.1703	0.08396	0.00173845	0.398551		1262.8	9.6	1244	11	1291	10		8537.75
70-106.5-70	154.2	51.9	2.772	0.101261	0.2346	0.00840598	0.90658	4.26258	0.152733	0.08555	0.00175944	0.448163		1348	7.8	1358.6	9.3	1327.1	9.3		15501.4
70-106.5-71	58.3	34.74	10.21	0.373897	0.4661	0.0168455	0.9115	2.14546	0.0775399	0.15827	0.00322364	0.453726		2456.3	9	2467	18	2436.4	6.5		6783.6
70-106.5-74	213.1	49.89	2.815	0.101647	0.2392	0.00865623	0.94055	4.1806	0.151289	0.08571	0.00174201	0.447855		1359.3	6.7	1383	11	1330.7	7		6190.36
70-106.5-75	201.6	44.7	2.914	0.115875	0.2323	0.00965117	0.93537	4.30478	0.178847	0.09123	0.00189187	0.653817		1385	14	1346	27	1450	10		3143.01
70-106.5-76	47.01	25.05	2.736	0.100965	0.2297	0.00836203	0.7267	4.35351	0.158486	0.08718	0.00184723	0.391951		1338.2	8.8	1333	12	1363	13		2604.93
70-106.5-78	288.8	51.41	2.241	0.0820247	0.2078	0.00759846	0.95434	4.81232	0.175968	0.07864	0.00159931	0.531282		1193.8	7.5	1217	12	1162.1	7.2		126289
70-106.5-79	94.1	40.21	1.983	0.0731167	0.1921	0.00701466	0.75339	5.20562	0.190087	0.07535	0.00158778	0.409341		1109.6	7.9	1133	11	1077	13		4537.15
70-106.5-81	113.2	54.89	2.241	0.0836245	0.2103	0.00777348	0.73362	4.75511	0.175767	0.07814	0.00165346	0.382657		1193.7	9.2	1230	13	1149	14		44454.4
70-106.5-83	64.9	23.11	2.209	0.0836756	0.1992	0.00734158	0.77101	5.02008	0.185017	0.08039	0.00171963	0.455485		1186.1	9.4	1171	13	1205	15		4168.13
70-106.5-84	149.6	42.18	1.985	0.0745371	0.189	0.00710762	0.55802	5.29101	0.198976	0.07678	0.00163452	0.472639		1110.2	9.1	1116	14	1114	15		280002
70-106.5-85	106.8	43.8	5.661	0.20645	0.3517	0.0125608	0.91659	2.84333	0.101548	0.11707	0.00239845	0.559301		1925.3	8.9	1943	12	1911.1	8		10883.1
70-106.5-86	135.6	85.2	4.9	0.203746	0.3235	0.0133645	0.97418	3.09119	0.127704	0.11006	0.00226647	0.486743		1801	18	1807	35	1799.4	8.9		9142.05
70-106.5-87	173.8	66.47	2.421	0.0898889	0.2138	0.00782849	0.90827	4.67727	0.171263	0.08206	0.00167605	0.493282		1248.6	9	1249	12	1246	8.1		12872.1
70-106.5-88	169.9	46.55	3.068	0.110971	0.2464	0.00903678	0.94855	4.05844	0.148844	0.09065	0.0018566	0.467706		1424.8	6.9	1420	14	1438.4	8.5		20854
70-106.5-89	120.7	32.38	3.799	0.138288	0.2825	0.0102763	0.91238	3.53982	0.128766	0.09734	0.00197627	0.454064		1592.5	8.1	1604	14	1572.9	6.6		145970
70-106.5-90	205.7	45.4	2.404	0.0886766	0.2122	0.00780515	0.94935	4.71253	0.173337	0.08248	0.00167848	0.503748		1243.8	8.4	1240	13	1256	7.5		20071
70-106.5-91	101.9	27.06	2.407	0.0878762	0.214	0.00783518	0.77576	4.6729	0.171089	0.0813	0.00174378	0.536216		1244.7	7.4	1250	12	1227	15		11349.9
70-106.5-92	278	71.3	2.827	0.101149	0.2405	0.00856821	0.87269	4.158	0.148136	0.08534	0.00173126	0.529124		1362.8	5.7	1389.3	8.4	1322.4	6.6		91333.3
70-106.5-93	311	141.2	2.229	0.0798457	0.2055	0.00732749	0.94166	4.86618	0.173513	0.07883	0.0015963	0.449786		1190.3	5.4	1204.8	7.3	1166.9	6.3		18571.9
70-106.5-94	44.83	39.59	2.744	0.104822	0.233	0.00847314	0.83086	4.29185	0.156075	0.08588	0.00185856	0.453655		1340	11	1350	12	1334	16		1661.56
70-106.5-97	137.3	162.3	5.085	0.182637	0.3356	0.0120303	0.86915	2.97974	0.106815	0.11136	0.00227221	0.396645		1833.5	6.9	1865	13	1820.8	7.4		12487.5
70-106.5-98	118.2	31.18	2.407	0.0881659	0.2187	0.00786329	0.94666	4.57247	0.164402	0.08045	0.00164878	0.437878		1244.6	7.7	1275.1	9.6	1207.1	8.9		4198.72
70-106.5-99	332.5	150.1	1.833	0.0721447	0.1736	0.00682113	0.93809	5.76037	0.226338	0.07705	0.00159461	0.422933		1057	12	1032	17	1124.5	9.4		9683.72
70-106.5-101	195	54.8	2.49	0.0918484	0.219	0.00803195	0.93149	4.56621	0.167468	0.08297	0.001698	0.4815		1268.8	8.4	1276	13	1267.5	8.4		96187.2
70-106.5-102	137.6	45.33	2.383	0.0857694	0.2142	0.00759243	0.63159	4.66853	0.165479	0.08158	0.00170945	0.465092		1237.4	5.9	1251	6.3	1234	12		15434.6
70-106.5-103	20.31	18.63	2.245	0.0915589	0.2064	0.00771208	0.3389	4.84496	0.181031	0.0791	0.00232222	0.418171		1195	15	1213	16	1171	42		968.986
70-106.5-104	152	100	2.467	0.0898914	0.2216	0.00814896	0.91427	4.51264	0.165944	0.08153	0.00166366	0.50141		1262.3	7.4	1290	13	1233.2	7.8		59418.8
70-106.5-105	37.98	12.26	2.762	0.109298	0.2293	0.00892293	0.85559	4.3611	0.169707	0.08742	0.0019145	0.46748		1345	14	1331	21	1369	17		3851.06
70-106.5-106	180.6	83.9	2.472	0.0900595	0.2138	0.00767368	0.88339	4.67727	0.167876	0.0841	0.00173364	0.438306		1263.8	7.2	1248.9	9	1293.8	9.7		13555.7
70-106.5-107	248.8	60.9	3.189	0.118566	0.2538	0.0092015	0.85418	3.94011	0.142848	0.09174	0.0018991	0.375103		1454.3	9.8	1458	12	1461	10		33649.3
70-106.5-108	79.2	21.95	1.871	0.0669648	0.1799	0.00649661	0.87019	5.55864	0.200736	0.07534	0.0016075	0.432183		1070.8	4.9	1066.7	8.5	1076	15		44397.2
70-106.5-109	335	137	3.01	0.17521	0.224	0.013508	0.9963	4.46429	0.269212	0.09736	0.00199411	0.170544		1408	36	1302	58	1575.4	9.1		8613.8
70-106.5-110	59.53	19.73	2.714	0.106429	0.2295	0.00864645	0.94049	4.3573	0.164162	0.086	0.00179402	0.42038		1332	13	1332	17	1337	12		3919.67
70-106.5-111	98.9	43.36	2.698	0.10106	0.2235	0.00818239	0.87153	4.47427	0.163804	0.08779	0.00184294	0.486452		1327.8	9.8	1300	13	1377	12		8686.25
Discordant data
70-106.5-3	690	218.3	1.388	0.0690001	0.0961	0.00360599	0.88312	10.4058	0.390461	0.1047	0.00326111	0.403327		883	21	591.7	7.4	1706	43		920.11
70-106.5-6	585	175.1	1.389	0.052196	0.1124	0.00455701	0.96118	8.8968	0.360701	0.09043	0.00200697	0.144925		884	8.2	687	13	1433	18		1644.93
70-106.5-12	159.4	76.2	16.2	0.597987	0.5096	0.0186068	0.9817	1.96232	0.0716494	0.23178	0.0046693	0.410629		2889	11	2655	23	3063.6	3.9		12046
70-106.5-18	1810	533	0.8481	0.030989	0.04097	0.00153581	0.94067	24.4081	0.914967	0.14975	0.00304508	0.324706		623.6	4.9	258.8	3.4	2342.3	6.3		293.747
70-106.5-21	11.4	2.51	36.2	1.96349	0.558	0.0229221	0.81823	1.79211	0.0736182	0.464	0.0151697	0.44442		3669	42	2857	48	4129	40		48.9771
70-106.5-25	610	272.5	1.347	0.0491798	0.10431	0.00377496	0.92701	9.58681	0.346945	0.09292	0.00190096	0.339717		866.3	6.1	639.6	5.6	1485.3	8.2		1521.4
70-106.5-31	990	216	1.087	0.0636272	0.072	0.00577844	0.99218	13.8889	1.11467	0.1093	0.00371195	0.128625		746	25	448	31	1783	50		748.725
70-106.5-40	476	118.9	1.768	0.067514	0.1406	0.00539038	0.97505	7.11238	0.272677	0.09129	0.00183901	0.504055		1033	10	848	13	1451.9	4.5		2180.75
70-106.5-43	1140	376.4	1.092	0.0407034	0.0647	0.00237926	0.97865	15.4559	0.568372	0.12213	0.00249527	0.515412		749.5	6.9	404.1	4.4	1986.6	7.3		692.312
70-106.5-54	632	222	2.098	0.0782366	0.1478	0.00544517	0.97674	6.7659	0.249266	0.10297	0.00208114	0.371058		1147.9	8.8	888.7	9.4	1677.5	5.3		1928.57
70-106.5-69	1047	416	1.015	0.0381841	0.06562	0.00238965	0.74386	15.2393	0.554961	0.11162	0.00228554	0.412308		711.3	7	409.7	4	1825.1	7.9		697.283
70-106.5-72	1278	694	0.94	0.0395779	0.051	0.00239713	0.98431	19.6078	0.921618	0.1342	0.00294004	0.27074		673	11	320.5	9.7	2152	16		401.706
70-106.5-77	833	260	1.27	0.0487422	0.0855	0.00349214	0.97767	11.6959	0.477705	0.10872	0.00230011	0.252672		832.1	9.1	529	11	1777	13		804.472
70-106.5-82	779	393.9	1.207	0.0501362	0.0839	0.00405747	0.90915	11.919	0.576409	0.1061	0.00259863	0.716304		804	12	520	17	1732	25		915.352
70-106.5-95	1410	605	0.896	0.0532208	0.046	0.00297357	0.99516	21.7391	1.40528	0.1426	0.00294148	0.221797		649	23	290	15	2258.1	8.8		403.99
70-106.5-96	1214	108	14.695	0.523392	0.4796	0.0180005	0.13799	2.08507	0.0782578	0.2237	0.00550061	0.73124		2795.6	6.3	2525	28	3006	23		89586.7
70-106.5-100	2220	630	0.522	0.0230172	0.02584	0.00122079	0.99217	38.6997	1.82834	0.14747	0.00307788	0.235863		426.2	9.2	164.4	5.2	2316	10		303.724
